# Supplementary material for: Text mining occupations from the mental health electronic health record: a natural language processing approach using records from the Clinical Record Interactive Search (CRIS) platform in south London, UK
Source: BMJ Open. 2021 Mar 25;11(3):e042274. doi: 10.1136/bmjopen-2020-042274 (PMC7996661; doi:10.1136/bmjopen-2020-042274)
Supplement: Supplementary data [file bmjopen-2020-042274supp001.pdf]

**Supplementary File 1: Descriptions of the datasets used in the development, testing and implementation of the occupation application**

| <b>Application Development and Testing Datasets</b>           |                                         |                                         |                                                    |
|---------------------------------------------------------------|-----------------------------------------|-----------------------------------------|----------------------------------------------------|
|                                                               | <b>Type of document</b>                 | <b>Document count</b>                   | <b>No. of Occupation Annotations (manual)</b>      |
| Validation corpus                                             | Personal history                        | 77<br>(+256 documents used in training) | 405                                                |
| Testing corpus 1: with vs without machine-learning comparison | Personal history + other CRIS documents | 200                                     | 521                                                |
| Testing corpus 2: gold-standard annotated documents           | Personal history                        | 666                                     | 3,429                                              |
| Testing corpus 4: Unannotated documents                       | Personal history                        | 200                                     | 442                                                |
| <b>Application Implementation Dataset</b>                     |                                         |                                         |                                                    |
|                                                               | <b>Type of document</b>                 | <b>Patient count</b>                    | <b>No. Of Occupation Extractions (application)</b> |
| CRIS case register of patient records aged $\geq 16$          | Attachments                             | 341,720                                 | 21,321,757 (all relations)                         |
|                                                               | Events                                  |                                         |                                                    |
|                                                               | Correspondence                          |                                         |                                                    |
|                                                               | Discharge Notification Summaries        |                                         |                                                    |
|                                                               | History                                 |                                         |                                                    |

|  |                           |  |  |
|--|---------------------------|--|--|
|  | Mental State Formulations |  |  |
|  | Presenting Circumstances  |  |  |
|  | Risk Events               |  |  |
|  | Social Situation          |  |  |
|  | Ward Progress Notes       |  |  |

Table 1: Descriptions of the datasets used in the development, testing and implementation of the occupation application
